# Supplementary material
Source: Springer Nature journal article supplement (https://publikationen.ub.uni-frankfurt.de/opus4/files/7207/12943_2009_465_MOESM8_ESM.PDF)
Supplement: MOESM8 [file 12943_2009_465_MOESM8_ESM.PDF]

## Additional file 8

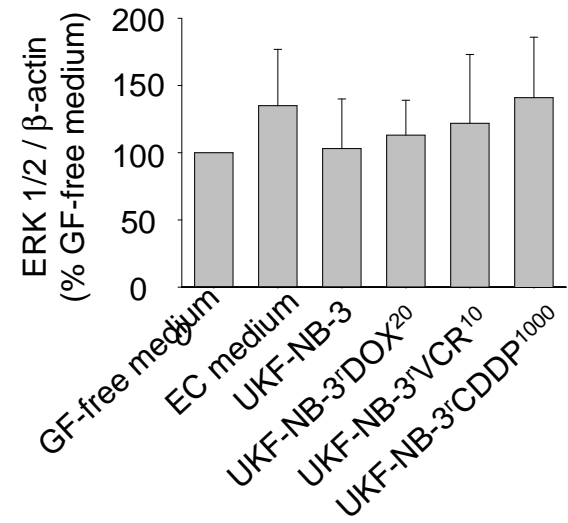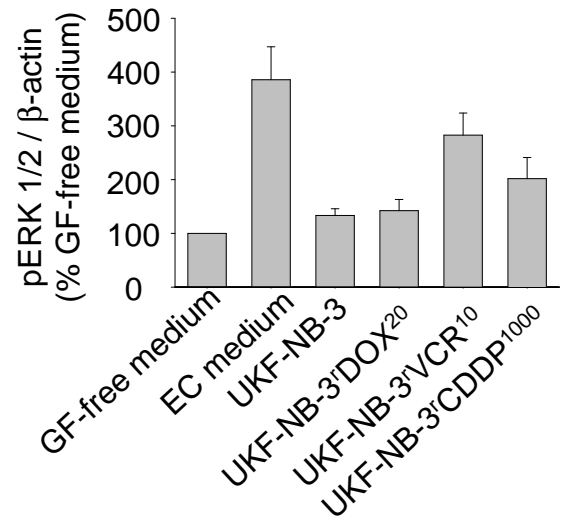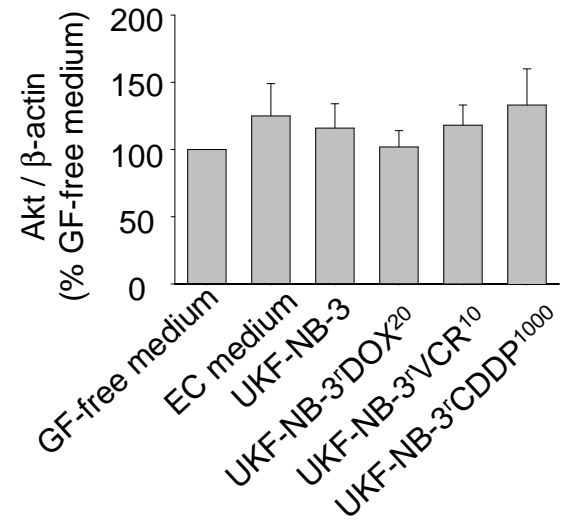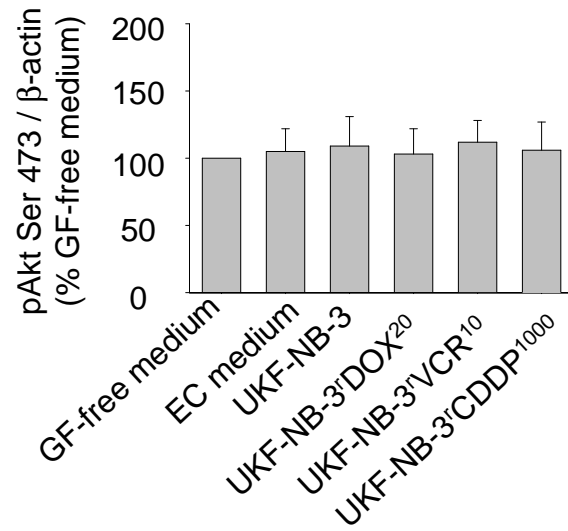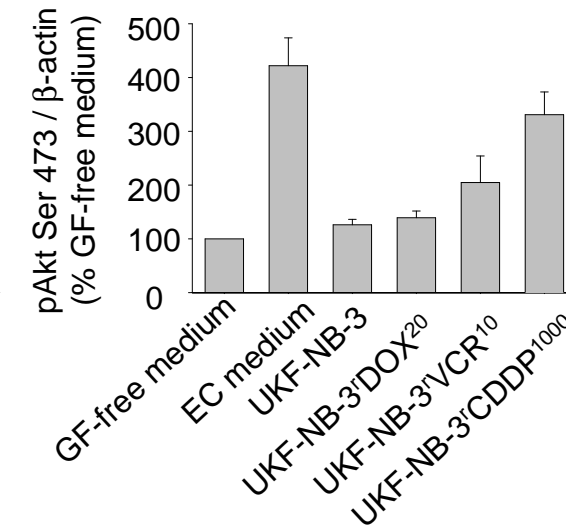

**Additional file 8.** Densitometric analysis of Western blot analyses investigating expression of ERK 1/2, phosphorylated ERK 1/2 (pERK 1/2), Akt, Akt phosphorylated at Ser473 (pAkt Ser473), or Akt phosphorylated at Thr308 (pAkt Thr308) in endothelial cells incubated with 1:1 mixtures of IMDM and supernatants of UKF-NB-3, UKF-NB-3<sup>VCR</sup><sup>10</sup>, UKF-NB-3<sup>CDDP</sup><sup>1000</sup>, or UKF-NB-3<sup>DOX</sup><sup>20</sup> cells + 10% FCS in comparison to EC medium and GF-free medium for 24 h.  $\beta$ -actin was used as loading control.
